# Supplementary material
Source: publisher site journal article supplement (https://edge.sagepub.com/sites/default/files/Wisner%20Chapter%20Outline%2008%20Supplement.docx)
Supplement: Supplementary file 1 [file Wisner%20Chapter%20Outline%2008%20Supplement.docx]

Chapter Outline

# Chapter 8 Supplement: Job Scheduling and Vehicle Routing

***See pages 245-268.***

Introduction

Job Scheduling

Job Scheduling in Product‐Focused Systems

Job Scheduling in Process‐Focused Systems

Dispatch Rules

Vehicle Scheduling and Routing

The Clark and Wright Savings Heuristic

The Cluster‐First‐Route‐Second Heuristic

The Concurrent Scheduler Approach
